# Supplementary material for: Impact of epidermal growth factor receptor (EGFR) activating mutations and their targeted treatment in the prognosis of stage IV non-small cell lung cancer (NSCLC) patients harboring liver metastasis
Source: PubMed Central journal article supplement (PMC4528698; doi:10.1186/s12967-015-0622-x), 2015-08-07
Supplement: 12967_2015_622_MOESM1_ESM.pdf [file 12967_2015_622_MOESM1_ESM.pdf]

| Characteristics                       | No liver involvement at onset | Liver metastasis at onset | p value |
|---------------------------------------|-------------------------------|---------------------------|---------|
| <b>Sex</b>                            |                               |                           |         |
| Male                                  | 133 (67.9%)                   | 33 (82.5%)                | 0.08    |
| Female                                | 66 (32.1%)                    | 7 (17.5%)                 |         |
| <b>T</b>                              |                               |                           | 0.4     |
| Tx                                    | 11 (5.6%)                     | 0 (0%)                    |         |
| T1                                    | 30 (15.3%)                    | 5 (12.5%)                 |         |
| T2                                    | 64 (32.7%)                    | 10 (25%)                  |         |
| T3                                    | 28 (14.3%)                    | 7 (17.5%)                 |         |
| T4                                    | 63 (32.1%)                    | 18 (45%)                  |         |
| <b>N</b>                              |                               |                           | 0.3     |
| Nx                                    | 4 (2%)                        |                           |         |
| N0                                    | 33 (16.8%)                    | 6 (15%)                   |         |
| N1                                    | 10 (5.1%)                     | 3 (7.5%)                  |         |
| N2                                    | 81 (41.3%)                    | 11 (27.5%)                |         |
| N3                                    | 68 (34.7%)                    | 20 (50%)                  |         |
| <b>M1</b>                             | 196                           | 40                        | -       |
| <b>Bone metastases</b>                | 89 (45.4%)                    | 27 (67.5%)                | 0.01    |
| <b>Bone metastases at onset</b>       | 69 (35.2%)                    | 25 (62.5%)                | 0.01    |
| <b>Skin metastases</b>                | 13 (6.6%)                     | 4 (10%)                   | 0.5     |
| <b>Skin metastases at onset</b>       | 7 (3.6%)                      | 3 (7.5%)                  | 0.3     |
| <b>Adrenal metastases</b>             | 55 (28.1%)                    | 12 (30%)                  | 0.8     |
| <b>Adrenal metastases at onset</b>    | 33 (16.8%)                    | 11 (27.5%)                | 0.1     |
| <b>Brain metastases</b>               | 88 (44.9%)                    | 13 (32.5%)                | 0.1     |
| <b>Brain metastases at onset</b>      | 66 (33.7%)                    | 9 (22.5%)                 | 0.2     |
| <b>Smoker</b>                         |                               |                           | 0.07    |
| Non smoker                            | 46 (23.5%)                    | 10 (25%)                  |         |
| Ex smoker                             | 98 (50%)                      | 15 (37.5%)                |         |
| Smoker                                | 50 (25.5%)                    | 14 (35%)                  |         |
| <b>EGFR</b>                           |                               |                           | 0.06    |
| Wild type                             | 125 (63.8%)                   | 19 (47.5%)                |         |
| Mutate                                | 26 (13.3%)                    | 4 (10%)                   |         |
| Unknown                               | 45 (23%)                      | 17 (42.5%)                |         |
| <b>KRAS</b>                           |                               |                           | 0.4     |
| Wild type                             | 71 (36.2%)                    | 11 (27.5%)                |         |
| Mutated                               | 19 (9.7%)                     | 3 (7.5%)                  |         |
| Unknown                               | 106 (54.1%)                   | 26 (65%)                  |         |
| <b>Histology</b>                      |                               |                           | 0.2     |
| Adenocarcinoma                        | 145 (74%)                     | 23 (57.5%)                |         |
| Squamous cell                         | 22 (11.2%)                    | 7 (17.5%)                 |         |
| Adenosquamous                         | 2 (1%)                        | 0 (0%)                    |         |
| Giant cell                            | 17 (8.7%)                     | 7 (17.5%)                 |         |
| Undifferentiated                      | 10 (5.1%)                     | 3 (7.5%)                  |         |
| <b>Median ECOG (range)</b>            | 1 (0-2)                       | 1 (0-2)                   | 0.6     |
| <b>Media Age (range)</b>              | 65.5 (47-89)                  | 62 (35-84)                | 0.1     |
| <b>Median Number of lines (range)</b> | 2 (1-7)                       | 2 (1-6)                   | 0.8     |
