# Supplementary material for: Impact of epidermal growth factor receptor (EGFR) activating mutations and their targeted treatment in the prognosis of stage IV non-small cell lung cancer (NSCLC) patients harboring liver metastasis
Source: PubMed Central journal article supplement (PMC4528698; doi:10.1186/s12967-015-0622-x), 2015-08-07
Supplement: 12967_2015_622_MOESM2_ESM.pdf [file 12967_2015_622_MOESM2_ESM.pdf]

|               |             |
|---------------|-------------|
| EGFR analyzed |             |
| Wild type     | 144 (82.7%) |
| Mutated       | 30 (17.3%)  |
| Exon 19       | 18 (60%)    |
| Exon 21       | 8 (26.7%)   |
| Exon 18       | 1 (3.3%)    |
| Exon 20       | 1 (3.3%)    |
| Not available | 2 (6.7%)    |
| KRAS analyzed |             |
| Wild Type     | 82 (78.8%)  |
| Mutated       | 22 (21.2%)  |
| G12D          | 6 (27.3%)   |
| G12V          | 4 (18.2%)   |
| G12C          | 2 (9.1%)    |
| G13D          | 2 (9.1%)    |
| G12A          | 1 (4.5%)    |
| G12S          | 1 (4.5%)    |
| L19F          | 1 (4.5%)    |
| Not specified | 5 (22.7%)   |
