# Supplementary material for: Impact of epidermal growth factor receptor (EGFR) activating mutations and their targeted treatment in the prognosis of stage IV non-small cell lung cancer (NSCLC) patients harboring liver metastasis
Source: PubMed Central journal article supplement (PMC4528698; doi:10.1186/s12967-015-0622-x), 2015-08-07
Supplement: 12967_2015_622_MOESM3_ESM.pdf [file 12967_2015_622_MOESM3_ESM.pdf]

| <b>Metastasis Localization</b>        | <b>EGFR wild type<br/>(n = 144)</b> | <b>EGFR mutated<br/>(n = 29)</b> | <b>p value</b> |
|---------------------------------------|-------------------------------------|----------------------------------|----------------|
| Bone metastases at onset              | 58 (40.3%)                          | 15 (51.7%)                       | 0.9            |
| Bone metastases during disease        | 73 (50.7%)                          | 15 (51.7%)                       | 0.9            |
| Liver metastases at onset             | 19 (13.2%)                          | 4 (13.8%)                        | 0.9            |
| Liver metastases during disease       | 46 (31.9%)                          | 9 (31%)                          | 0.8            |
| Adrenal metastases at onset           | 26 (18.1%)                          | 6 (20.7%)                        | 0.7            |
| Adrenal metastases during disease     | 38 (26.4%)                          | 10 (34.5%)                       | 0.3            |
| Brain metastases at onset             | 46 (31.9%)                          | 12 (41.4%)                       | 0.3            |
| Brain metastases during disease       | 38 (26.4%)                          | 10 (34.5%)                       | 0.7            |
| Skin metastases at onset              | 3 (2.1%)                            | 0 (0%)                           | 0.9            |
| Skin metastases during disease        | 9 (6.3%)                            | 0 (0%)                           | 0.4            |
| Bilateral lung lesions at onset       | 22 (15.3%)                          | 5 (17.2%)                        | 0.8            |
| Bilateral lung lesions during disease | 23 (15.9%)                          | 6 (20.7%)                        | 0.6            |
