# Supplementary material for: Impact of epidermal growth factor receptor (EGFR) activating mutations and their targeted treatment in the prognosis of stage IV non-small cell lung cancer (NSCLC) patients harboring liver metastasis
Source: PubMed Central journal article supplement (PMC4528698; doi:10.1186/s12967-015-0622-x), 2015-08-07
Supplement: 12967_2015_622_MOESM4_ESM.pdf [file 12967_2015_622_MOESM4_ESM.pdf]

| <b>Variable</b>                       | <b>HR</b> | <b>p</b> |
|---------------------------------------|-----------|----------|
| ECOG                                  | 1.03      | 0.123    |
| Sex                                   | 1.01      | 0.2      |
| Age                                   | 0.79      | 0.31     |
| Smoker status                         | 0.9       | 0.99     |
| T                                     | 1.03      | 0.74     |
| N                                     | 1.29      | 0.02     |
| EGFR                                  | 0.31      | 0.01     |
| KRAS                                  | 1.02      | 0.95     |
| Histology                             | 1.01      | 0.95     |
| Number of lines                       | 0.94      | 0.22     |
| TKIs (first line)                     | 0.45      | 0.06     |
| TKIs (after progression)              | 0.4       | 0.03     |
| Liver metastases at onset             | 2.28      | 0.009    |
| Liver metastases during disease       | 1.55      | 0.04     |
| Bone metastases at onset              | 2.13      | 0.001    |
| Bone metastases during disease        | 1.93      | 0.01     |
| Brain metastases at onset             | 1.16      | 0.5      |
| Brain metastases during disease       | 0.98      | 0.93     |
| Skin metastases at onset              | 4.67      | 0.03     |
| Skin metastases during disease        | 0.68      | 0.51     |
| Adrenal metastases at onset           | 1.75      | 0.03     |
| Adrenal metastases during disease     | 1.46      | 0.1      |
| Bilateral lung lesions at onset       | 1.06      | 0.8      |
| Bilateral lung lesions during disease | 0.82      | 0.9      |
