# Supplementary material for: Impact of epidermal growth factor receptor (EGFR) activating mutations and their targeted treatment in the prognosis of stage IV non-small cell lung cancer (NSCLC) patients harboring liver metastasis
Source: PubMed Central journal article supplement (PMC4528698; doi:10.1186/s12967-015-0622-x), 2015-08-07
Supplement: 12967_2015_622_MOESM5_ESM.pdf [file 12967_2015_622_MOESM5_ESM.pdf]

| <b>Variable</b>                 | <b>HR</b> | <b>p</b> |
|---------------------------------|-----------|----------|
| Sex                             | 1.28      | 0.32     |
| Age                             | 1         | 0.9      |
| N                               | 1.28      | 0.06     |
| EGFR                            | 0.24      | 0.001    |
| TKIs (after progression)        | 0.44      | 0.03     |
| Liver metastases at onset       | 1.5       | 0.28     |
| Liver metastases during disease | 1.28      | 0.43     |
| Bone metastases at onset        | 1.6       | 0.22     |
| Bone metastases during disease  | 1.19      | 0.64     |
| Skin metastases at onset        | 2.2       | 0.31     |
| Adrenal metastases at onset     | 1.37      | 0.29     |
